# Supplementary material for: Oral Microbiome Stamp in Alzheimer’s Disease
Source: MDPI journal article supplement (doi:10.3390/pathogens13030195), 2024-02-23
Supplement: s1 [file s1]

**Table S1.** Periodontal parameters in AD and control groups.

| Parameters                | AD Periodontitis ( <i>n</i> = 56) | Control Periodontitis ( <i>n</i> = 58) | <i>p</i> -value  |
|---------------------------|-----------------------------------|----------------------------------------|------------------|
| Bone loss (%)             | 73 (59–79)                        | 72.5 (60.25–76.0)                      | <i>p</i> = 0.691 |
| BoP (score) 1/2/3         | 32/20/4 (57.1%, 35.7%, 7.1%)      | 31/21/6 (53.4%, 36.2%, 10.3%)          | <i>p</i> = 0.817 |
| PPD (mm)                  | 7 (6–7)                           | 7 (6–7)                                | <i>p</i> = 0.386 |
| CAL (mm)                  | 3.5 (3–4)                         | 4(3–4)                                 | <i>p</i> = 0.817 |
| GR (mm)                   | –3 (–4––2.5)                      | 3 (–3.5––2)                            | <i>p</i> = 0.454 |
| Number of remaining teeth | 9.5 (8–16)                        | 10.5 (9–15)                            | <i>p</i> = 0.580 |
