# Supplementary material for: Oral Microbiome Stamp in Alzheimer’s Disease
Source: MDPI journal article supplement (doi:10.3390/pathogens13030195), 2024-02-23
Supplement: s1 [file s1]

**Table S2.** Periodontal parameters by gender in AD and control groups.

| Parameters                     | Female ( <i>n</i> = 102)        | Male ( <i>n</i> = 33)         | <i>p</i> -value  |
|--------------------------------|---------------------------------|-------------------------------|------------------|
| Periodontitis                  | 88 (86%)                        | 26 (78%)                      | <i>p</i> = 0.406 |
|                                | Female Control ( <i>n</i> = 54) | Male Control ( <i>n</i> = 17) | <i>p</i> -value  |
| Periodontitis in Control group | 45 (83.3%)                      | 13 (76.4%)                    | <i>p</i> = 0.495 |
|                                | Female AD ( <i>n</i> = 48)      | Male AD ( <i>n</i> = 16)      | <i>p</i> -value  |
| Periodontitis in AD group      | 43 (89.5%)                      | 13 (81.2%)                    | <i>p</i> = 0.401 |
